# Supplementary material for: We are What We Eat: Impact of Food from Short Supply Chain on Metabolic Syndrome
Source: PubMed Central journal article supplement (PMC6947359; doi:10.3390/jcm8122061), 2019-11-23
Supplement: jcm-08-02061-s001.pdf [file jcm-08-02061-s001.pdf]

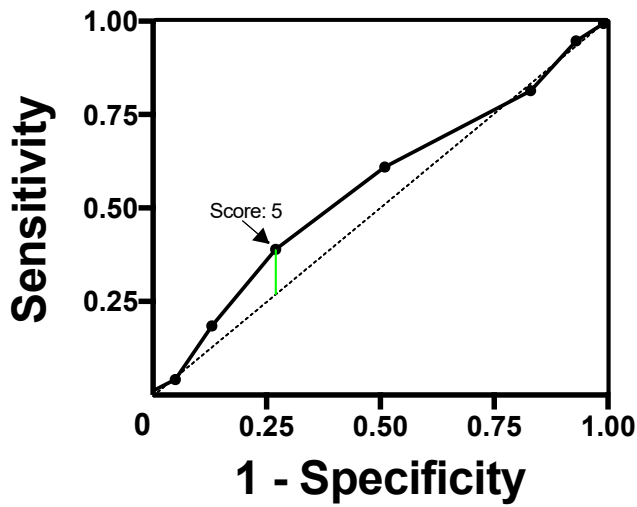

**Supplementary Figure 1**

**Determination of the optimal cut off value in our questionnaire.**

After having obtained the receiver operating characteristic (ROC) curve, we calculated the Youden's index; the 5 score displayed the highest Youden's J value (0.667), shown in green.
